# Supplementary material for: Ab initio study of the excited-state proton transfer mechanisms for 3-hydroxy-2-(thiophen-2-yl)chromen-4-one
Source: Royal Society of Chemistry journal article supplement (doi:10.1039/c6ra16907d), 2016-01-01
Supplement: c6ra16907d1.pdf [file c6ra16907d1.pdf]

## Supporting Information

### **Ab Initio Study on the Excited-State Proton Transfer Mechanisms for 3-hydroxy-2-(thiophen-2-yl) chromen-4-one**

Huipeng Ma\*<sup>1</sup>, Jindou Huang\*<sup>2</sup>

<sup>1</sup> College of Medical Laboratory Science, Dalian Medical University, Dalian 116044, China

<sup>2</sup> School of Physics and Materials Engineering, Dalian Nationalities University, Dalian 116600, China

\*Corresponding author: Huipeng Ma, E-mail: [hpma@dlmedu.edu.cn](mailto:hpma@dlmedu.edu.cn), Tel: +86-411-86110391;

Jin-Dou Huang, E-mail: [jindouhuang@dicp.ac.cn](mailto:jindouhuang@dicp.ac.cn), Tel: +86-411-84379236.

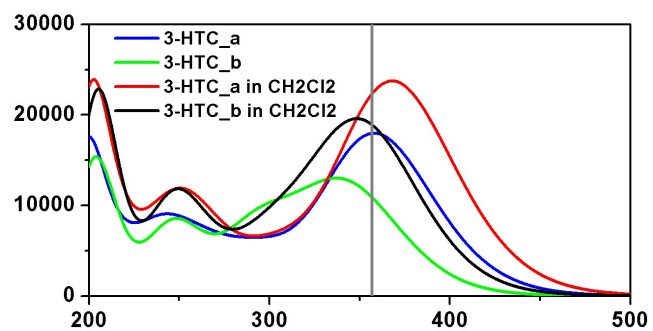

Figure S1. Calculated UV-Vis absorption spectra of 3-HTC-a and 3-HTC-b in vacuum (blue and green lines) and in CH<sub>2</sub>Cl<sub>2</sub> (red and black lines) based on the optimized geometries at DFT/B3LYP-D3BJ/TZVP level.

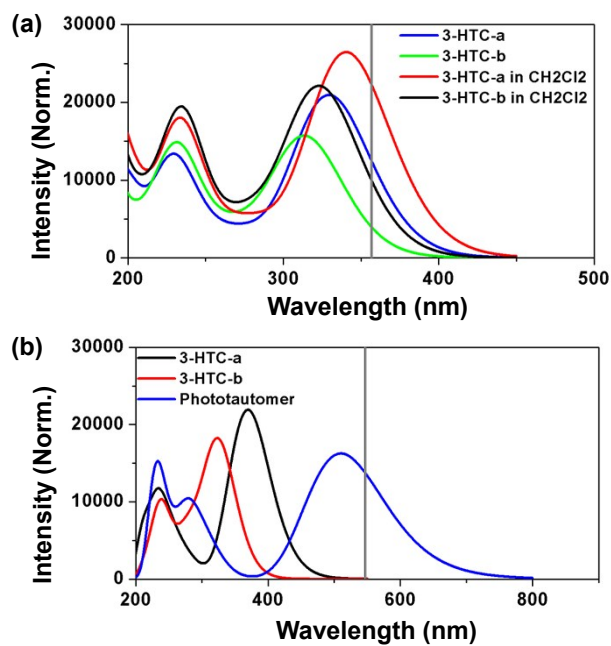

Figure S2. (a) Calculated UV-Vis absorption spectra of 3-HTC-a and 3-HTC-b in vacuum (blue and green lines) and in CH<sub>2</sub>Cl<sub>2</sub> (red and black lines); and (b) the fluorescence spectra of 3-HTC-a (red line), phototautomer of 3-HTC-a (blue line), and 3-HTC-b (black line) at DFT/cam-B3LYP/def2-qzvpd level; the cross vertical line shows the experimental data in CH<sub>2</sub>Cl<sub>2</sub>.

Table S1 Calculated bond lengths ( $\text{\AA}$ ), angles and dihedral angles of 3-HTC-a and 3-HTC-b structures of the  $S_0$  state in vacuum and in  $\text{CH}_2\text{Cl}_2$  at DFT/B3LYP-D3BJ/TZVP level, as well as structural parameters of  $S_1$  states in vacuum at TDDFT/cam-B3LYP/def2-qzvpd level.

| Molecules                                           | O1-H1 |       | O2-H1 |       | S-H1  |       | O1-H1-O2/S |       | C1-C2-C3-S |       |
|-----------------------------------------------------|-------|-------|-------|-------|-------|-------|------------|-------|------------|-------|
|                                                     | $S_0$ | $S_1$ | $S_0$ | $S_1$ | $S_0$ | $S_1$ | $S_0$      | $S_1$ | $S_0$      | $S_1$ |
| <b>3-HTC-a</b>                                      | 0.978 | 0.995 | 2.047 | 1.853 | 3.815 | 3.880 | 117.5      | 123.0 | 0.0        | 0.0   |
| <b>3-HTC-b</b>                                      | 0.967 | 0.963 | 3.628 | 3.571 | 2.401 | 2.363 | 126.6      | 124.5 | 27.8       | 15.6  |
| <b>3-HTC-a(<math>\text{CH}_2\text{Cl}_2</math>)</b> | 0.977 |       | 2.065 |       | 3.814 |       | 116.8      |       | 0.0        |       |
| <b>3-HTC-b(<math>\text{CH}_2\text{Cl}_2</math>)</b> | 0.968 |       | 3.619 |       | 2.431 |       | 124.3      |       | 28.6       |       |

Table S2. Calculated energies of 3-HTC-a and 3-HTC-b structures for the  $S_0$  state in vacuum and in  $\text{CH}_2\text{Cl}_2$  at DFT/B3LYP/TZVP level and DFT/B3LYP-D3BJ/TZVP level; and calculated energies of 3-HTC-a and 3-HTC-b structures for the  $S_1$  state in vacuum at TDDFT/B3LYP/TZVP level and TDDFT/cam-B3LYP/def2-qzvpd level.

| <b>Molecules</b>                                         | Energy for $S_0$ (Hartree) |               | Energy for $S_1$ (Hartree) |                        |
|----------------------------------------------------------|----------------------------|---------------|----------------------------|------------------------|
|                                                          | B3LYP/TZVP                 | B3LYP-D3/TZVP | B3LYP/TZVP                 | cam-B3LYP/<br>Def2QZVP |
| <b>3-HTC-a</b>                                           | -1124.3173027              | -1124.3765874 | -1124.3100778              | -1124.0591531          |
| <b>3-HTC-b</b>                                           | -1124.3003653              | -1124.3599452 | -1124.28401                | -1124.0394386          |
| <b>3-HTC-a<br/>(<math>\text{CH}_2\text{Cl}_2</math>)</b> | -1124.3250677              | -1124.3843362 |                            |                        |
| <b>3-HTC-b<br/>(<math>\text{CH}_2\text{Cl}_2</math>)</b> | -1124.312819               | -1124.3723956 |                            |                        |
